# Supplementary material for: A J-Protein Co-chaperone Recruits BiP to Monomerize IRE1 and Repress the Unfolded Protein Response
Source: PubMed Central journal article supplement (PMC5733394; doi:10.1016/j.cell.2017.10.040), 2017-12-14
Supplement: mmc1.pdf [file mmc1.pdf]

**Cell, Volume 171**

**Supplemental Information**

**A J-Protein Co-chaperone Recruits BiP  
to Monomerize IRE1 and Repress  
the Unfolded Protein Response**

**Niko Amin-Wetzel, Reuben A. Saunders, Maarten J. Kamphuis, Claudia Rato, Steffen Preissler, Heather P. Harding, and David Ron**

**Table S1: Plasmids used in this study, related to STAR methods and Key resources table**

| ID     | Plasmid name                                         | Description                                                                                                            | Comments/reference                                  | Figure                                                                       |
|--------|------------------------------------------------------|------------------------------------------------------------------------------------------------------------------------|-----------------------------------------------------|------------------------------------------------------------------------------|
| UK173  | haBiP_27-654_pQE10                                   | N-terminally His6-tagged hamster BiP                                                                                   | PMID: 18923430                                      | 4A,C,D,F,G;S3A,B;5A,B,D,E,F;S4B,C,D;6A,B,C,S5                                |
| UK182  | haBiP_27-654_V461F_pQE10                             | N-terminally His6-tagged hamster BiP V461F                                                                             | PMID: 18923430                                      | 4C,F;5A,B;S4C;6B                                                             |
| UK838  | haBiP_27-654_T229A_pQE10                             | N-terminally His6-tagged hamster BiP T229A                                                                             | PMID: 26673894                                      | 4C,F;5A;S4C;6B                                                               |
| UK1047 | PERK_GST_pCDNA3                                      | mPERK 1-585 (LD + TM) fused to GST                                                                                     | This paper. Thanks to Yuhong Zhang.                 | 2D                                                                           |
| UK1070 | pFLAGM1_mP58dSP1_CMV1                                | FLAGM1 mP58_27_504 (ASP) in pFLAG_pCMV1                                                                                | This paper. Thanks to Yusuke Sekine.                | 2E                                                                           |
| UK1314 | pCEFL_mCherry_3XFLAG_C                               | pCEFL with 3XFLAG_C tagged from mCherry-tagged plasmid                                                                 | PMID: 25858979                                      | 1C;S1B                                                                       |
| UK1558 | IRE1_Q105C_g1b_pSpCas9(BB)-2A-Puro                   | Cas9 targeted to CHO IRE1 exon 5 to introduce indel                                                                    | This paper                                          | Used to generate $\Delta$ IRE1 and IRE1-Q105C cell lines for 1D,E;2H;3B,C;S2 |
| UK1559 | IRE1_Q105C_g2a_pSpCas9(BB)-2A-Puro                   | Cas9 targeted to CHO IRE1 exon 5 to introduce Q105C mutation via HDR                                                   | This paper                                          | Used to generate IRE1-Q105C cell line for 3B,C;S2                            |
| UK1610 | pSpCas9(BB)-2A-mCherry_V2                            | Modified pSpCas9(BB)-2A vector to express mCherry together with guide RNA/Cas9                                         | This paper                                          | Used to generate cell line for 1A                                            |
| UK1682 | ERdj1_g1_pSpCas9(BB)-2A-mCherry                      | mCherry-tagged CRISPR plasmid (UK1610) for targeting hamster ERdj1 (primers 1274 and 1275)                             | ERdj1 (Mtj1) DNAJC1 Gene ID: 100751540 This paper   | Used to generate cell line for 1A                                            |
| UK1683 | ERdj1_g2_pSpCas9(BB)-2A-mCherry                      | mCherry-tagged CRISPR plasmid (UK1610) for targeting hamster ERdj1 (primers 1276 and 1277)                             |                                                     | Used to generate cell line for 1A                                            |
| UK1684 | ERdj2_g1_pSpCas9(BB)-2A-mCherry                      | mCherry-tagged CRISPR plasmid (UK1610) for targeting hamster ERdj2 (primers 1278 and 1279)                             | ERdj2 (Sec63) Gene ID: 100775020 This paper         | Used to generate cell line for 1A,B                                          |
| UK1685 | ERdj3_g1_pSpCas9(BB)-2A-mCherry                      | mCherry-tagged CRISPR plasmid (UK1610) for targeting hamster ERdj3 (primers 1280 and 1281)                             |                                                     | Used to generate cell line for 1A                                            |
| UK1686 | ERdj3_g2_pSpCas9(BB)-2A-mCherry                      | mCherry-tagged CRISPR plasmid (UK1610) for targeting hamster ERdj3 (primers 1282 and 1283)                             | ERdj3 (HEDJ) Dnajb11 Gene ID: 100765455 This paper  | Used to generate cell line for 1A                                            |
| UK1687 | ERdj4_g1_pSpCas9(BB)-2A-mCherry                      | mCherry-tagged CRISPR plasmid (UK1610) for targeting hamster ERdj4 (primers 1284 and 1285)                             |                                                     | Used to generate cell line for 1A,B,C,D,E;S1B,C,D;2B,D,E,F,G;3E              |
| UK1688 | ERdj4_g2_pSpCas9(BB)-2A-mCherry                      | mCherry-tagged CRISPR plasmid (UK1610) for targeting hamster ERdj4 (primers 1286 and 1287)                             | ERdj4 (MDG-1) Dnajb9 Gene ID: 100763648 This paper  | Used to generate cell line for 1A,B,C,D,E;S1B,C,D;2B,D,E,F,G;3E              |
| UK1689 | ERdj5_g1_pSpCas9(BB)-2A-mCherry                      | mCherry-tagged CRISPR plasmid (UK1610) for targeting hamster ERdj5 (primers 1288 and 1289)                             |                                                     | Used to generate cell line for 1A                                            |
| UK1690 | ERdj5_g2_pSpCas9(BB)-2A-mCherry                      | mCherry-tagged CRISPR plasmid (UK1610) for targeting hamster ERdj5 (primers 1290 and 1291)                             | ERdj5 (JPDI) Dnajc10 Gene ID: 100689230 This paper  | Used to generate cell line for 1A                                            |
| UK1691 | ERdj6_g1_pSpCas9(BB)-2A-mCherry                      | mCherry-tagged CRISPR plasmid (UK1610) for targeting hamster ERdj6 (primers 1292 and 1293)                             |                                                     | Used to generate cell line for 1A                                            |
| UK1692 | ERdj6_g2_pSpCas9(BB)-2A-mCherry                      | mCherry-tagged CRISPR plasmid (UK1610) for targeting hamster ERdj6 (primers 1294 and 1295)                             | ERdj6 (p58IPK) Dnajc3 Gene ID: 100766172 This paper | Used to generate cell line for 1A                                            |
| UK1693 | ERdj7_g1_pSpCas9(BB)-2A-mCherry                      | mCherry-tagged CRISPR plasmid (UK1610) for targeting hamster ERdj7 (primers 1296 and 1297)                             |                                                     | Used to generate cell line for 1A                                            |
| UK1694 | ERdj7_g2_pSpCas9(BB)-2A-mCherry                      | mCherry-tagged CRISPR plasmid (UK1610) for targeting hamster ERdj7 (primers 1298 and 1299)                             | ERdj7 Dnajc25 Gene ID: 100756280 This paper         | Used to generate cell line for 1A                                            |
| UK1703 | hIRE1 $\alpha$ _19-486_dC_GST_del3UTR_pCDNA3         | GST tagged hIRE1 $\alpha$ lacking luminal domain cysteines for expression in mammalian cells                           | This paper                                          | 2B,D,E,F,G                                                                   |
| UK1765 | hIRE1 $\alpha$ _19-486_dC_GRVI_II_GST_del3UTR_pCDNA3 | GST tagged hIRE1 $\alpha$ with a deletion (403-441) lacking luminal domain cysteines for expression in mammalian cells | This paper                                          | 2F                                                                           |
| UK1739 | pCEFL_mCherry_CHO_ERdj4_3XFLAG_C                     | Mammalian expression of hamster 3XFLAG-tagged ERdj4 from mCherry-tagged plasmid                                        | This paper                                          | 1C;S1B;2B,C,D,E,F,G                                                          |
| UK1754 | pCEFL_mCherry_CHO_QDI_ERdj4_3XFLAG_C                 | Mammalian expression of hamster QPD mutant3XFLAG-tagged ERdj4 from mCherry-tagged plasmid                              | This paper                                          | 1C;S1B;2B                                                                    |
| UK1861 | ERdj8_guide1_pSpCas9(BB)-2A-mCherry_V2               | mCherry-tagged CRISPR plasmid (UK1610) for targeting hamster ERdj8 (oligos 1618 and 1619)                              | ERdj8 Dnajc16 Gene ID: 100751780 This paper         | Used to generate cell line for 1A                                            |
| UK1862 | hIRE1 $\alpha$ _19-486_dC_Q105C_GST_del3UTR_pCDNA3   | GST tagged hIRE1 $\alpha$ lacking luminal domain cysteines containing Q105C for expression in mammalian cells          | This paper                                          | 3E                                                                           |
| UK1915 | pGEX_GST_TEV_hIRE1a_LDAC_24-442_D443C                | N-terminally GST-tagged cysteine free human Ire1LD 24-442 with a C-terminal cysteine                                   | This paper                                          | 4A,C,D,F,G;S3A;5A,B,C,F;S4B,C                                                |
| UK1920 | huPPP1R15A_533_624_malE_pGEX_TEV_AviTag              | N-tern Avitagged human GADD34 533-624                                                                                  | This paper                                          | 5A                                                                           |
| UK2007 | pGEX_GST_TEV_hIRE1a_LDAC_24-443                      | N-terminally GST-tagged cysteine free human Ire1LD 24-442                                                              | This paper                                          | 5E;S4D                                                                       |
| UK2008 | haBiP_27-405_NBD_pQE10                               | Bacterial expression of BiP NBD                                                                                        | This paper                                          | S3A                                                                          |
| UK2012 | Smt3_cgERdj4_24-222_pET-21a                          | N-terminally His6-Smt3-tagged chinese hamster ERdj4 24-222                                                             | This paper                                          | 4A,C,D,F,G;S3A;5A,B,D,E,F;S4B,C,D                                            |
| UK2040 | Smt3_QPD_cgERdj4_24-222_pET-21a                      | N-terminally His6-Smt3-tagged chinese hamster ERdj4 24-222, H54Q                                                       | This paper                                          | 4C,F;5A                                                                      |
| UK2041 | Smt3_J4_domain_24-90_pET-21a                         | N-terminally His6-Smt3-tagged chinese hamster ERdj4 24-90                                                              | This paper                                          | 4C,F;5A;6B                                                                   |
| UK2045 | pET22b_H7_Smt3_Ire1a_LDAC_24_443_Q105C               | N-terminally His6-Smt3-tagged cysteine free human Ire1LD 24-443, Q105C                                                 | This paper                                          | 5E;S4D                                                                       |
| UK2047 | pET22b_H7_Smt3_Ire1a_LDAC_24_443_S152C               | Bacterial expression of Smt3-tagged cysteine-free Ire1a LDAC S152C                                                     | This paper                                          | S3B                                                                          |
| UK2048 | pET22b_H7_Smt3_Ire1a_LDAC_24_443_R234C               | N-terminally His6-Smt3-tagged cysteine free human Ire1LD 24-443, R234C                                                 | This paper                                          | 6A,B,C                                                                       |
| UK2076 | pET22b_H7_Smt3_Ire1a_LDAC_24_443_S112C               | N-terminally His6-Smt3-tagged cysteine free human Ire1LD 24-443, S112C                                                 | This paper                                          | 6A,B,C                                                                       |
| UK2098 | Smt3_cgERdj4_24-222_AviTag_pET21a                    | N-terminally His6-Smt3-tagged and C-terminally avi-tagged chinese hamster ERdj4 24-222, H54Q                           | This paper                                          | S4A                                                                          |
| UK2108 | Smt3_cgERdj4_24-222_GS6_MalE_pET21a                  | N-terminally His6-Smt3-tagged and C-terminally MBP-tagged chinese hamster ERdj4 24-222                                 | This paper                                          | S3B;6B,C;S5                                                                  |
| UK2117 | pET22b_H7_Smt3_Ire1a_LDAC_24_390_R234C               | N-terminally His6-Smt3-tagged cysteine free human Ire1CLD 24-390, R234C                                                | This paper                                          | S5                                                                           |
| UK2118 | pET22b_H7_Smt3_Ire1a_LDAC_24_390_S112C               | N-terminally His6-Smt3-tagged cysteine free human Ire1CLD 24-390, S112C                                                | This paper                                          | S5                                                                           |
| UK2119 | Smt3_cgERdj4_24-222_QPD_GS6_MalE_pET21a              | N-terminally His6-Smt3-tagged and C-terminally MBP-tagged chinese hamster ERdj4 24-222, H54Q                           | This paper                                          | 6B                                                                           |
| UK2132 | pCMV1_SP_QPD_J4_mCherry_KDEL                         | mammalian expression CHO QPD J4 mCherry with KDEL                                                                      | This paper                                          | S1C                                                                          |
| UK2080 | pCMV1_SP_J4_mCherry_KDEL                             | mammalian expression CHO ERdj4 J domain alone mCherry with KDEL                                                        | This paper                                          | S1C                                                                          |
| UK2127 | pCMV1_SP_ERdj4_3XFLAG_mCherry_KDEL                   | mammalian expression CHO ERdj4 3xFLAG mCherry with KDEL                                                                | This paper                                          | S1C                                                                          |
| UK888  | pFLAG_mCherry_KDEL_CMV1                              | mammalian expression of SP-FLAGM1-mCherry-KDEL (ER localized)                                                          | This paper                                          | S1C                                                                          |
| UK1881 | EcBirA_WT_pGEX_TEV                                   | Bacterial expression of fastidious E. coli BirA biotin ligase (R118 intact)                                            |                                                     | Used for in vitro biotinylation of UK1920                                    |

**Table S2: Oligonucleotides used in this study, related to STAR methods and Key resources table**

| ID   | Primer name                   | Sequence                                          | Description                                                   |
|------|-------------------------------|---------------------------------------------------|---------------------------------------------------------------|
| 1097 | IRE1_Q105C_knit_2as           | ATGGGCTAGCACAGACTAATCTCTGGATGGTAAAGGGAAGTTTC      | Primer for Q105C repair template of Q105 region of CHO IRE1   |
| 1098 | IRE1_Q105C_knit_3s            | CAGAATTAGTCTGTGCTAGCCCATCCGAAGTTCAGATGGAATCCTCTAC | Primer for Q105C repair template of Q105 region of CHO IRE1   |
| 1100 | IRE1_Q105_region_1s           | AGCCTCCATCTGCAGTGTCTCTCTG                         | Oligos for genotyping of CHO IRE1 Q105 region                 |
| 1101 | IRE1_Q105_region_2as          | CACAACCTTCCAGATTCCAGGATCACTGTG                    | Oligos for genotyping of CHO IRE1 Q105 region                 |
| 1116 | IRE1_Q105_region_3s           | GCTAGAAATAGTGTGGAGTGATCAG                         | Oligos for generating repair template of CHO IRE1 Q105 region |
| 1117 | IRE1_Q105_region_4as          | AACTATCCAGGTCACAGGTTATA                           | Oligos for generating repair template of CHO IRE1 Q105 region |
| 1125 | IRE1_Q105_region_1s [5'-6FAM] | AGCCTCCATCTGCAGTGTCTCTCTG                         | Oligo 1100 with 5'FAM for genotyping of CHO IRE1 Q105 region  |
| 1274 | ERdj1_guide1_S                | CACCGGGCCCGGGCGCGCGCTG                            | CRISPR-Cas9 guide oligonucleotide ERdj1                       |
| 1275 | ERdj1_guide1_AS               | AAACCGAGCCGCGCGCGGGGGCC                           | CRISPR-Cas9 guide oligonucleotide ERdj1                       |
| 1276 | ERdj1_guide2_S                | CACCGGGCCGCTGCTCCTCCGTT                           | CRISPR-Cas9 guide oligonucleotide ERdj1                       |
| 1277 | ERdj1_guide2_AS               | AAACAACGAGGACGACAGCGGCC                           | CRISPR-Cas9 guide oligonucleotide ERdj1                       |
| 1278 | ERdj2_guide1_S                | CACCGTCCAAGTTAATACTTCATA                          | CRISPR-Cas9 guide oligonucleotide ERdj2                       |
| 1279 | ERdj2_guide1_AS               | AAACTATGAAGTATTAACCTGGAC                          | CRISPR-Cas9 guide oligonucleotide ERdj2                       |
| 1280 | ERdj3_guide1_S                | CACCGGAAATCTCGCTGAGAGGAC                          | CRISPR-Cas9 guide oligonucleotide ERdj3                       |
| 1281 | ERdj3_guide1_AS               | AAACGCTCTCAGCGAGATTTC                             | CRISPR-Cas9 guide oligonucleotide ERdj3                       |
| 1282 | ERdj3_guide2_S                | CACCGGCTCGGAGTGCCTCGTAA                           | CRISPR-Cas9 guide oligonucleotide ERdj3                       |
| 1283 | ERdj3_guide2_AS               | AAACTACGAGGCACTCGAGGCC                            | CRISPR-Cas9 guide oligonucleotide ERdj3                       |
| 1284 | ERdj4_guide1_S                | CACCGCTCAGAGCGACAATCAAGA                          | CRISPR-Cas9 guide oligonucleotide ERdj4                       |
| 1285 | ERdj4_guide1_AS               | AAACTTTGATTTGCTGCTCTGAGC                          | CRISPR-Cas9 guide oligonucleotide ERdj4                       |
| 1286 | ERdj4_guide2_S                | CACCGGATATCATAGTAGCTTTG                           | CRISPR-Cas9 guide oligonucleotide ERdj4                       |
| 1287 | ERdj4_guide2_AS               | AAACCAAGAGCTACTATGATATCC                          | CRISPR-Cas9 guide oligonucleotide ERdj4                       |
| 1288 | ERdj5_guide1_S                | CACCGCTCAGTGCTAATTTCTTAA                          | CRISPR-Cas9 guide oligonucleotide ERdj5                       |
| 1289 | ERdj5_guide1_AS               | AAACTAAGAAATAGCACTGAAGC                           | CRISPR-Cas9 guide oligonucleotide ERdj5                       |
| 1290 | ERdj5_guide2_S                | CACCGTTCTCTACTTTCAGTTC                            | CRISPR-Cas9 guide oligonucleotide ERdj5                       |
| 1291 | ERdj5_guide2_AS               | AAACAACGCAAGTAGTAGAGAAC                           | CRISPR-Cas9 guide oligonucleotide ERdj5                       |
| 1292 | ERdj6_guide1_S                | CACCGGTGACTGTTTCAGTAAACCG                         | CRISPR-Cas9 guide oligonucleotide ERdj6                       |
| 1293 | ERdj6_guide1_AS               | AAACGCGTTACTGAAACAGTCACC                          | CRISPR-Cas9 guide oligonucleotide ERdj6                       |
| 1294 | ERdj6_guide2_S                | CACCGCTAAACCTCCGAATCTGC                           | CRISPR-Cas9 guide oligonucleotide ERdj6                       |
| 1295 | ERdj6_guide2_AS               | AAACGAGATTCCGGGAAGTTTAGC                          | CRISPR-Cas9 guide oligonucleotide ERdj6                       |
| 1296 | ERdj7_guide1_S                | CACCGGAAAGATTATGACTACATGC                         | CRISPR-Cas9 guide oligonucleotide ERdj7                       |
| 1297 | ERdj7_guide1_AS               | AAACGCATGTAGTCATAATCTTCC                          | CRISPR-Cas9 guide oligonucleotide ERdj7                       |
| 1298 | ERdj7_guide2_S                | CACCGACCCCTAACATCCACTTT                           | CRISPR-Cas9 guide oligonucleotide ERdj7                       |
| 1299 | ERdj7_guide2_AS               | AAACAAAGTGGATGTTAGGGTGGTC                         | CRISPR-Cas9 guide oligonucleotide ERdj7                       |
| 1367 | ERdj1_genomic_S               | CCGGCGCTTACTCTG                                   | Oligo for genotyping indels                                   |
| 1368 | ERdj1_genomic_AS              | CTCGGAACCCAGTGCATGTG                              | Oligo for genotyping indels                                   |
| 1369 | ERdj2_genomic_S               | GCCATACAGTTGAATTTATTTATGTCTTTGTC                  | Oligo for genotyping indels                                   |
| 1370 | ERdj2_genomic_AS              | GTTAACAGTCAAATTCGATTTCTTTGGAAATGTC                | Oligo for genotyping indels                                   |
| 1371 | ERdj3_genomic_S               | AGTGGGACTGTGAGAGAAGG                              | Oligo for genotyping indels                                   |
| 1372 | ERdj3_genomic_AS              | AATTTCTCTGGGCTTGGGGATCG                           | Oligo for genotyping indels                                   |
| 1373 | ERdj4_genomic_S               | GTGCATAGCTTTTCGAATGCTGC                           | Oligo for genotyping indels                                   |
| 1374 | ERdj4_genomic_AS              | CTTCAGCATCAGGCTCTTATTTTTG                         | Oligo for genotyping indels                                   |
| 1375 | ERdj5_genomic_S               | GTATCTTAATGTCACTTAAATAAGAACTTGC                   | Oligo for genotyping indels                                   |
| 1376 | ERdj5_genomic_AS              | CCAGATATTTAAAGAGAAATTTACCTACC                     | Oligo for genotyping indels                                   |
| 1377 | ERdj6_genomic_S               | CATTGAGATTATGAAGTCTCAGG                           | Oligo for genotyping indels                                   |
| 1378 | ERdj6_genomic_AS              | ACGCTAAGGGCTCTCAGAATAACG                          | Oligo for genotyping indels                                   |
| 1379 | ERdj7_genomic_S               | TACGTGCTTTAAGAGTATTGGGAAG                         | Oligo for genotyping indels                                   |
| 1380 | ERdj7_genomic_AS              | CAGTAAATGGCACATACACTGACC                          | Oligo for genotyping indels                                   |
| 1391 | ERdj1_genomic_2_S             | ATGTGGGCTCCCGCTTCGGAC                             | Oligo for genotyping indels                                   |
| 1392 | ERdj1_genomic_2_AS            | TTACCTGCTGACCCCGAGGAACTC                          | Oligo for genotyping indels                                   |
| 1393 | ERdj2_genomic_S [5'-6FAM]     | GCCATACAGTTGAATTTATTTATGTCTTTGTC                  | Oligo for genotyping indels (FAM)                             |
| 1394 | ERdj3_genomic_S [5'-6FAM]     | AGTGGGACTGTGAGAGAAGG                              | Oligo for genotyping indels (FAM)                             |
| 1395 | ERdj4_genomic_S [5'-6FAM]     | GTGCATAGCTTTTCGAATGCTGC                           | Oligo for genotyping indels (FAM)                             |
| 1396 | ERdj5_genomic_S [5'-6FAM]     | GTATCTTAATGTCACTTAAATAAGAACTTGC                   | Oligo for genotyping indels (FAM)                             |
| 1397 | ERdj6_genomic_S [5'-6FAM]     | CATTGAGATTATGAAGTCTCAGG                           | Oligo for genotyping indels (FAM)                             |
| 1398 | ERdj7_genomic_S [5'-6FAM]     | TACGTGCTTTAAGAGTATTGGGAAG                         | Oligo for genotyping indels (FAM)                             |
| 1409 | ERdj1_genomic_2_AS [5'-6FAM]  | TTACCTGCTGACCCCGAGGAACTC                          | Oligo for genotyping indels (FAM)                             |
| 1618 | ERdj8_guide1_S                | CACCGAGGCATATAAGAAAGCTCGCC                        | CRISPR guide targeting Ch ERdj8 (Dnajc16)                     |
| 1619 | ERdj8_guide1_AS               | AAACGCGGAGCTCTTATATGCCTC                          | CRISPR guide targeting Ch ERdj8 (Dnajc16)                     |
| 1650 | ERdj8_genomic_1_S             | gagagATGgaggtgaaaaagctgagcgtctc                   | genotyping ERdj8 KOs in CHO cells                             |
| 1651 | ERdj8_genomic_1_AS            | ATCATAATTGAGGCTTCAGGCACCTGCTACTGCTC               | genotyping ERdj8 KOs in CHO cells                             |
| 1652 | ERdj8_genomic_2_S             | cagaagaagagagATGgaggtgaaaaagctg                   | genotyping ERdj8 KOs in CHO cells                             |
| 1653 | ERdj8_genomic_2_AS            | CAGGCTACTAGCTGAGCACCATAACTC                       | genotyping ERdj8 KOs in CHO cells                             |
| 1675 | ERdj8_genomic_2_AS[5'-6FAM]   | [6FAM]CAGGCTACTAGCTGAGCACCATAACTC                 | Oligo for genotyping indels (FAM)                             |

**Table S3: Clones generated in this study, related to STAR methods**

| Gene  | Description | Clone | Allele | Amino acid sequence (number shows amino acid position at which insert/deletion occurred)                                                                                                                                         |
|-------|-------------|-------|--------|----------------------------------------------------------------------------------------------------------------------------------------------------------------------------------------------------------------------------------|
| ERDJ1 | Knock out   | #15   |        | 1 ...RIPQ13inRGM*<br>2 ...RIPQ13inSPAPGAAVVLRLAAAAPAGGRGAGARLGERRPGVVRLGGRGAAQLLRVPRGAAGCFICRHQKSIS*                                                                                                                             |
|       |             | #16   |        | 1 ...RRPG18indelXRCGLCEPHTNVGGRRGGHIIGCCCCSWRPWGRCAPGRAETWSCSTWWKRCSTSTSSSGCSRMLHLQTSEKHIVSFH*<br>2 ...LSSS23inRLAAAAPAGGRGAGARLGERRPGVVRLGGRGAAQLLRVPRGAAGCFICRHQKSIS*                                                          |
| ERDJ2 | Knock out   | #9    |        | 1 ...YNPY83inGSIKLGWSNSSRN*<br>2 ...EYNP82delWILEQQ*                                                                                                                                                                             |
|       |             | #16   |        | 1 ...YNPY83inGSIKLGWSNSSRN*<br>2 ...QEYN81indelP*                                                                                                                                                                                |
| ERDJ3 | Knock out   | #8    |        | 1 ...VPRS35delQETSPTASS*<br>2 ...VPRS35delAKGHQKGLQETSPTASS*                                                                                                                                                                     |
|       |             | #11   |        | 1 ...RSAS37inDFELQESYCAAMNDSINLVFYIPSILDGKTRXLNTYKGHQKGLQETSPTASS*<br>2 ...VPRS35delAGN*                                                                                                                                         |
| ERDJ4 | Knock out   | #1    |        | 1 ...ERQI42inTM*<br>2 ...ERQI42delRPFTN*                                                                                                                                                                                         |
|       |             | #21   |        | 1 ...LASK25inRATMIS*                                                                                                                                                                                                             |
| ERDJ5 | Knock out   | #4    |        | 1 ...GVSK44inNCK*<br>2 ...YSL40del*                                                                                                                                                                                              |
|       |             | #11   |        | 1 ...RQAF55indelITIKWTFI*<br>2 ...RQAF55inKEISTEVTS*                                                                                                                                                                             |
| ERDJ6 | Knock out   | #3    |        | 1 ...KAQR373inKNIMIEVSKKQKKYSMYSLISG*<br>2 ...EKAQ372inHLEFLAGHHRPAQHQEEDRSPAVTETVTETRL*                                                                                                                                         |
|       |             | #4    |        | 1 ...QIRE366delGTETVTETRL*<br>2 ...EKAQ372inRVTETVTETRL*                                                                                                                                                                         |
| ERDJ7 | Knock out   | #22   |        | 1 ...LAPK23inVMYWAQCQAGHLPSLTSSIGGVLGI*<br>2 ...SHYY13indelIQGDFGQCMCHFSVSVFQLVE*                                                                                                                                                |
|       |             | #25   |        | 1 ...LAPK23inGATALRPPSAPEWMLGW*<br>2 ...RLAP22delISGC*                                                                                                                                                                           |
| ERDJ8 | Knock out   | #37   |        | 1 ...YKKL52inSPGNIGILTIKITLLELRTSSFRSARPMRYCPMRKRQMTMTMAMPGRTRAIRSSSASTASAIMTTSISRSPFSTSPSIRSAGTRLMRSTCCTFHHT*<br>2 ...ASQA43delIGNIGILTIKITLLELRTSSFRSARPMRYCPMRKRQMTMTMAMPGRTRAIRSSSASTASAIMTTSISRSPFSTSPSIRSAGTRLMRSTCCTFHHT* |
|       |             | #41   |        | 1 ...YKKL52insYGRAYHLAPVLQ*<br>2 ...IKKA48del*                                                                                                                                                                                   |
| IRE1  | Knock out   | NC6   |        | 1 ...KLPFT1100delISQN*<br>2 ...KLPFT1100delISQN*                                                                                                                                                                                 |
| IRE1  | Knock in    | CV1   |        | 1 ...KLPFTIPELVCASPSRSSDGILYM...<br>2 ...KLPFTIPELVCASPSRSSDGILYM...                                                                                                                                                             |
|       |             | CV8   |        | 1 ...KLPFTIPELVCASPSRSSDGILYM...<br>2 ...KLPFTIPELVCASPSRSSDGILYM...                                                                                                                                                             |

**Table S4: Repair template used to generate the endogenous Q105C, related to STAR methods**

to introduce Q105C and C109S mutations.

GCTAGAAATAGTGTGGAGTGATCAGTATAAGTCATCTCATTGAACTTCTTGCCCTATGGGTGTTGTC  
CCCCTCTAGAGGTATCAAACTGAGCCTGGACAAGTCAAAGAATTTACCAAGACCAAAGCTTCCAG  
GAAGAGGTGTGATTTCCCAAGGATACTCCCTCAGCTGTGATAGTATCTGTCCTGGAGCACAGGAATC  
CAGAGTGATTCCAGAAACATCTGGCAAACTCTGGGCATTGTTCCCTCTTGCTGTCATTTTCTTTTTT  
TAAGTGTAGTTTGAATGTAGGAGTGATAGGAAAATCCAATAGTTAATACCTCTGGCTCTGTTTATT  
AACACTACCAAGAAATCTTTTATCCCTCAGAGAAAAGGTAATAGTATAGTAGAAGCCTAGCAGCAAG  
TAGAGCAGGTATCTGCACAGTTTCAGGGCCCGTTCCAAAAATAAAGTTACCCGAAACAAGCAGTTGT  
CAAAAGGGCCTGTGAGAAGTCAGCTGTGGGCTCAGAAGAGGCAGTTGTATGATGAGATGTGTTGAA  
ACGTTGGGACTTCTGGAGTTTCTTTCCGGGCACCTACCATAACTTCTTTTTATAACCCAAAGACTC  
TGTTTTCAGTAAAGAATTACTTACTGAAGAAAACATCAAACTCAGACCTTTGTTTCCCTTGAACC  
ATTCTCCTCTCTTGAACCTTGACTTTCTTTTTTTTTTCCCAAGGCAGGGTTTCTGTAGCTTTGGA  
GCCTGTCTGGCCTCCTCTGAGACCAGGCTGGCCTCGAAGTACAGAGATCCGCCTGCCTCTGC  
CTCCCGAGTGCTGGGATTAAGGCGTGCACCAACGCCAGCTTGAACCTTGACTTACTCTAAG  
TTGCTTCTTTTTCAGCATTAAATGGTCTCCCATGGTAAAAGGCATTGTCTACCTGGCTTGGATTTATCTT  
TGGCTGGGAGTTGAAGACAGATTTCTTTCTCCCTACAATACCTAAGACTGTGCAGCTTTTTCACATTT  
GTGTAATTTTCTCAGAAAAGGCTTGTGGCACCTCAGGGAATACCGGGATGGGAGACCCGAGGGAC  
CTGTGCATCTATGTCAAATAAATGTGTTGGTGTACAGAGTTCAGAGGCTGGGGAGCCAGAGGCT  
GTTGGAAGTAGATGTGGAACCTAGGATCTCCTCGTAGGTTCCAATAAAAGCCTCCATCTGCAGT  
GTGCTTCTCTGTTTTAGAACTGGGTAACAGAAAGCAGCATGCTTAGTAAAATTACAGCAATTTACAA  
GACTTGGTTTACTTATTTTTTACTTTTTTTTTTAAAGAACTTCCCTTACCATCCCAGAAATTAGTCT  
GTGCTAGCCCATCCCGAAGTTCAGATGGAATCCTCTACATGGGTAAGAGTTCCCATTTTTCAGCACCA  
AAAACCTGGCTTTTTGACAGTGAATCCTGGAATCTGGGAAAGTTGTGATTAAGAGAGCAGGATATT  
GTCACCTCTTCAAATCTTTCTGAGAAAAGGTTTCTTGCCTCAGTTGTGCTTGGTGTGCTGTTCA  
TGCCAGGATCATCTGGCCAATTAAGAAAGAGTTCTCTGAGGAAAATTGACATCATTAAATATGGT  
TACTCATTTAACAAGCTTTTACGCAATTTGCAACCTACCTAGCTGCAAAATGGATAAAAATTTAAAGTAA  
TACAGTAGTCTGAGCCAAGGAAGGGAAGCCAGGCCCTGCTATTAATTACAGAGCTTTCTTAGGATT  
TCCTGCTATCAGAATATTTGGTAGAAGCAGCACTTAACAGCTTGCCTAGATAAGCTGTCTTCATACCT  
GTGGGGTACAGCTTTCAAAGCATCAGCTCACCTGCTTTTCTCAGCACATTGCTGCCAAAATGTCAA  
TAAAAATGCATTGGTTGCACAAGAAGAGCTGTGTCCTGTGTTTATATAGCAGCTTTCTTTTTGAGGA  
ACTGAAAGTGCTGTTGCCTATTCATGCCTCAGGAGCTCTATGTACATTTTCAAGTCTCAAATGCAGG  
CCGGCTGGTTTTAAGTTTTGCTAGGGACACCAAGCTCCTGCTTCTTGCACGAGCTTTTTCAGAAATG  
AGGAACTCCCAACCAATATATTCGTAGGAAATGACCAGCAAACCTCTGGGCCATGCTCTGGACCCAT  
ATGACCATCTTCTGTGTTATTGTTCTCTATCGGTCTCCAGCAATCCATCATCTGTATCAACTAGGA  
TATTTTGTTCACCATCTTTGTGTCATGCTTAAGCTAGTTACTGAGTATATTTATGAGCATGATAG  
TTACTCAATCCACCCATCATAGCTGTAGGTAGATTATACAGACTGCAAGTGGTCTTGAAGTCAACAG  
GTGTATGTCTCATAGATGGAAGGTATTAATGGTCATAGTTATTTGGATATATTTTATTCTATATTTA  
GACCTTTTAAATCTAAGACCTTATTGTTGAAAACAGTTAGGATCCACAAACAAGTTGGTCATGTGTG  
GAATCTGGTGTATTACATCTGTTACAGCTAAGTATAGCTTTAGCAAATCTGTTGCCCTGTGACCTTCT  
CTGGCATCTGTATTCTACTTCCATAGGAACTTGAATGTAGGAAACATCTATTAAGTAGGAAGATA  
TAAATGTCTAATAAATGTCCAGAGGCGTGGCTTACAGAATAGAAATGCACACATTACAGTTGACTGT  
GTTGGCCATCAAATATACCATCCATCCATACCGTAGACACATATGCTATATATTTTCTAAAAGTGT  
TATGTGACTGACTGTCTGTGTTTATATTTAATCAGCTGACCAAGGCAAGAGGTATAACCTGTGAC  
CTGGGAATAGTT

**Table S5: Protein concentrations used in this study, related to STAR methods****Fig 4**

| Figure | Component  | Conc in reaction | UK Reference Number |
|--------|------------|------------------|---------------------|
| 4C     | IRE1LD-bio | 5 $\mu$ M        | 1915                |
|        | ERdj4      | 8 $\mu$ M        | 2012                |
|        | BiP        | 30 $\mu$ M       | 173                 |
|        | ERdj4 QPD  | 8 $\mu$ M        | 2040                |
|        | JERdj4     | 8 $\mu$ M        | 2041                |
|        | BiP V461F  | 30 $\mu$ M       | 182                 |
|        | BiP T229A  | 30 $\mu$ M       | 838                 |
|        | ATP        | 2 mM             |                     |
| 4D     | IRE1LD-bio | 5 $\mu$ M        | 1915                |
|        | ERdj4      | 8 $\mu$ M        | 2012                |
|        | BiP        | 30 $\mu$ M       | 173                 |
|        | ATP        | 2 mM             |                     |
| 4F     | IRE1LD-bio | n/a              | 1915                |
|        | IRE1LD-TAM | 0.5 $\mu$ M      | 2028                |
|        | ERdj4      | 8 $\mu$ M        | 2012                |
|        | BiP        | 30 $\mu$ M       | 173                 |
|        | ERdj4 QPD  | 8 $\mu$ M        | 2040                |
|        | JERdj4     | 8 $\mu$ M        | 2041                |
|        | BiP V461F  | 30 $\mu$ M       | 182                 |
|        | BiP T229A  | 30 $\mu$ M       | 838                 |
|        | ATP        | 2 mM             |                     |
|        | ADP        | 2 mM             |                     |
| 4G     | IRE1LD-bio | n/a              | 1915                |
|        | IRE1LD-TAM | 0.5 $\mu$ M      | 2028                |
|        | ERdj4      | 8 $\mu$ M        | 2012                |
|        | GRP170     | 1 $\mu$ M        | 1264                |
|        | BiP        | 30 $\mu$ M       | 173                 |
|        | ATP        | 2 mM             |                     |

**Fig S3**

|     |            |             |      |
|-----|------------|-------------|------|
| S3A | IRE1LD-bio | 5 $\mu$ M   | 1915 |
|     | ERdj4      | 4 $\mu$ M   | 2012 |
|     | BiP        | 30 $\mu$ M  | 173  |
|     | BiP NBD    | 30 $\mu$ M  | 2008 |
|     | ATP        | 2 mM        |      |
|     | ADP        | 2mM         |      |
| S3B | IRE1LD-OG  | 0.7 $\mu$ M | 2047 |
|     | ERdj4      | 5 $\mu$ M   | 2108 |
|     | BiP        | 40 $\mu$ M  | 173  |
|     | ATP        | 2 mM        |      |

**Figure 5**

|    |            |             |      |
|----|------------|-------------|------|
| 5A | Ire1LD-bio | 25 nM       | 1915 |
|    | GADD34-bio | 25 nM       | 1920 |
|    | ERdj4      | 1.5 $\mu$ M | 2012 |
|    | ERdj4 QPD  | 1.5 $\mu$ M | 2040 |
|    | JERdj4     | 1.5 $\mu$ M | 2041 |
|    | BiP        | 1 $\mu$ M   | 173  |
|    | BiP V461F  | 1 $\mu$ M   | 182  |
|    | BiP T229A  | 1 $\mu$ M   | 838  |
|    | ATP        | 2 mM        |      |
| 5B | Ire1LD-bio | 200 nM      | 1915 |
|    | ERdj4      | 1.2 $\mu$ M | 2012 |
|    | BiP        | 6 $\mu$ M   | 173  |
|    | BiP V461F  | 6 $\mu$ M   | 182  |
| 5D | IRE1LD-bio | n/a         | 1915 |
|    | IRE1LD-TAM | 0.5 $\mu$ M | 2028 |
|    | ERdj4      | 8 $\mu$ M   | 2012 |

|  |        |            |      |
|--|--------|------------|------|
|  | BiP    | 30 $\mu$ M | 173  |
|  | GRP170 | 1 $\mu$ M  | 1264 |
|  | ATP    | 2 mM       |      |

|    |                  |             |      |
|----|------------------|-------------|------|
| 5E | IRE1LD-bio       | 25 nM       | 2007 |
|    | IRE1LD Q105C-bio | 25 nM       | 2045 |
|    | ERdj4            | 2.5 $\mu$ M | 2012 |

|    |                   |            |      |
|----|-------------------|------------|------|
| 5F | IRE1LD-bioK       | 6 $\mu$ M  | 2007 |
|    | IRE1LD Q105C-bioK | 6 $\mu$ M  | 2045 |
|    | ERdj4             | 8 $\mu$ M  | 2012 |
|    | BiP               | 30 $\mu$ M | 173  |
|    | ATP               | 2 mM       |      |

Figure S4

|     |           |        |      |
|-----|-----------|--------|------|
| S4A | ERdj4-bio | 200 nM | 2098 |
|     | Ire1LD    | varies | 2007 |

|     |            |           |      |
|-----|------------|-----------|------|
| S4B | Ire1LD-bio | 25 nM     | 1915 |
|     | ERdj4      | varies    | 2012 |
|     | BiP        | 1 $\mu$ M | 173  |
|     | ATP        | 2 mM      |      |

|     |            |             |      |
|-----|------------|-------------|------|
| S4C | Ire1LD-bio | 25 nM       | 1915 |
|     | ERdj4      | 1.5 $\mu$ M | 2012 |
|     | BiP        | varies      | 173  |
|     | BiP V461F  | 1 $\mu$ M   | 182  |
|     | BiP T229A  | 1 $\mu$ M   | 838  |
|     | ATP        | 2 mM        |      |

|     |                  |             |      |
|-----|------------------|-------------|------|
| S4D | Ire1LD-bio       | 2.3 $\mu$ M | 2007 |
|     | IRE1LD Q105C-bio | 2.3 $\mu$ M | 2045 |
|     | ERdj4            | 1.7 $\mu$ M | 2012 |
|     | BiP              | 6 $\mu$ M   | 173  |
|     | ATP              | 2 mM        |      |

Figure 6

|    |              |        |      |
|----|--------------|--------|------|
| 6A | Ire1LD-R234C | 66 nM  | 2048 |
|    | Ire1LD-S112C | 133 nM | 2076 |
|    | Ire1LD       | varies | 2007 |
|    | BiP          | varies | 173  |

|    |              |             |      |
|----|--------------|-------------|------|
| 6B | Ire1LD-R234C | 66 nM       | 2048 |
|    | Ire1LD-S112C | 133 nM      | 2076 |
|    | BiP          | 50 $\mu$ M  | 173  |
|    | ERdj4        | 30 $\mu$ M  | 2108 |
|    | ERdj4 QPD    | 2.5 $\mu$ M | 2119 |
|    | JERdj4       | 2.5 $\mu$ M | 2041 |
|    | BiP AMP      | 30 $\mu$ M  | 173  |
|    | BiP V461F    | 30 $\mu$ M  | 182  |
|    | BiP T229A    | 30 $\mu$ M  | 838  |
|    | GRP170       | 1 $\mu$ M   | 1264 |

|    |              |             |      |
|----|--------------|-------------|------|
| 6C | Ire1LD-R234C | 66 nM       | 2048 |
|    | Ire1LD-S112C | 133 nM      | 2076 |
|    | BiP          | 50 $\mu$ M  | 173  |
|    | ERdj4        | 2.5 $\mu$ M | 2012 |
|    | JERd6        | 2.5 $\mu$ M | 185  |

Figure S5

|    |               |             |      |
|----|---------------|-------------|------|
| S5 | Ire1CLD-R234C | 66 nM       | 2117 |
|    | Ire1CLD-S112C | 133 nM      | 2118 |
|    | BiP           | 50 $\mu$ M  | 173  |
|    | ERdj4         | 2.5 $\mu$ M | 2012 |
|    | ATP           | 2 mM        |      |

**Table S6: Reproducibility of key observation, related to STAR methods**

| Figure |         | Number of times key observation has been reproduced |
|--------|---------|-----------------------------------------------------|
| 1      | A       | 3 with 2 independent clones                         |
|        | B       | 3                                                   |
|        | C       | >3                                                  |
|        | D       | 3                                                   |
|        | E       | 6                                                   |
|        | F       | n/a                                                 |
| S1     | A       | 3                                                   |
|        | B       | n/a                                                 |
|        | C       | 3                                                   |
|        | D       | >3                                                  |
| 2      | A       | n/a                                                 |
|        | B       | >3                                                  |
|        | C       | n/a                                                 |
|        | D       | 3                                                   |
|        | E       | 3                                                   |
|        | F       | 6                                                   |
|        | G       | 3                                                   |
|        | H       | >3                                                  |
| 3      | A       | n/a                                                 |
|        | B       | 2                                                   |
|        | C       | 3                                                   |
|        | D       | n/a                                                 |
|        | E       | 6                                                   |
|        | F       | n/a                                                 |
| S2     | A       | >3 with 2 independent clones and mixed population   |
| 4      | A       | n/a                                                 |
|        | B       | n/a                                                 |
|        | C       | >3 twice in its entirety                            |
|        | D       | 2                                                   |
|        | E       | n/a                                                 |
|        | F       | >3 twice in its entirety                            |
|        | G       | 3                                                   |
|        | H       | n/a                                                 |
| S3     | A       | 2                                                   |
|        | B       | >3                                                  |
|        | C       | n/a                                                 |
| 5      | A       | >3                                                  |
|        | B       | 2                                                   |
|        | C       | n/a                                                 |
|        | D       | 4                                                   |
|        | E       | >3                                                  |
|        | F       | 2                                                   |
| S4     | A       | >3                                                  |
|        | B       | >3                                                  |
|        | C       | >3                                                  |
|        | D left  | >3                                                  |
|        | D right | 2                                                   |
| 6      | A       | >3                                                  |
|        | B       | >3                                                  |
|        | C       | >3                                                  |
| S5     | A       | >3                                                  |
| 7      | A       | n/a                                                 |
